# Supplementary material for: Insight into the mechanism of methanol assistance with syngas conversion over partially hydroxylated γ-Al2O3(110D) surface in slurry bed
Source: Royal Society of Chemistry journal article supplement (doi:10.1039/c8cp02000k), 2018-01-01

**Supplementary Information:**

**Insight into the mechanism of methanol assistance with syngas  
conversion over partially hydroxylated  $\gamma$ -Al<sub>2</sub>O<sub>3</sub> (110D) surface in  
slurry bed**

Bing Bai, Hui Bai,\* Hao-Jie Cao, Zhi-Hua Gao, Zhi-Jun Zuo, Wei Huang\*

*Key Laboratory of Coal Science and Technology of Ministry of Education and Shanxi Province, Taiyuan  
University of Technology, Taiyuan 030024, Shanxi, China*

\*Corresponding authors:

E-mail addresses: baihui@tyut.edu.cn; huangwei@tyut.edu.cn;

**Table S1** Structural parameters and adsorption energies of adsorbed H<sub>2</sub>O in different configurations.

| <b>Configurations</b>             | <b><math>E_{\text{ads}}/\text{kJ mol}^{-1}</math></b> | <b>Al–O<sub>water</sub> bond/Å</b> | <b>O<sub>surface</sub>–H bond/Å</b> | <b>O<sub>water</sub>–H bond/Å</b> |
|-----------------------------------|-------------------------------------------------------|------------------------------------|-------------------------------------|-----------------------------------|
| (110D)-1×1-H <sub>2</sub> O (b)   | 196.3                                                 | 1.73                               | 1.00                                | 0.97                              |
| (110D)-1×1-H <sub>2</sub> O (b-1) | 183.1                                                 | 1.93                               | 1.00                                | 1.03                              |
| (110D)-1×1-H <sub>2</sub> O (b-2) | 182.6                                                 | 1.73                               | 1.01                                | 0.97                              |
| (110D)-1×1-H <sub>2</sub> O (b-3) | 176.3                                                 | 1.75                               | 1.00                                | 0.97                              |
| (110D)-1×1-H <sub>2</sub> O (b-4) | 164.1                                                 | 1.74                               | 0.99                                | 0.97                              |
| (110D)-1×1-H <sub>2</sub> O (b-5) | 149.3                                                 | 1.98                               | 0.98                                | 1.05                              |
| (110D)-1×1-2H <sub>2</sub> O (c)  | 205.5                                                 | 1.78                               | 0.98                                | 1.02                              |

**Figure S1** Top and side views of the optimized low-lying configurations of  $\gamma\text{-Al}_2\text{O}_3$  (110D)- $1\times 1$  surface with 1  $\text{H}_2\text{O}$  adsorbed ( $\theta_{\text{OH}} \approx 4.5 \text{ OH}\cdot\text{nm}^{-2}$ ) in liquid paraffin, with their relative adsorption energies of  $\text{H}_2\text{O}$  in  $\text{kJ}\cdot\text{mol}^{-1}$  indicated.

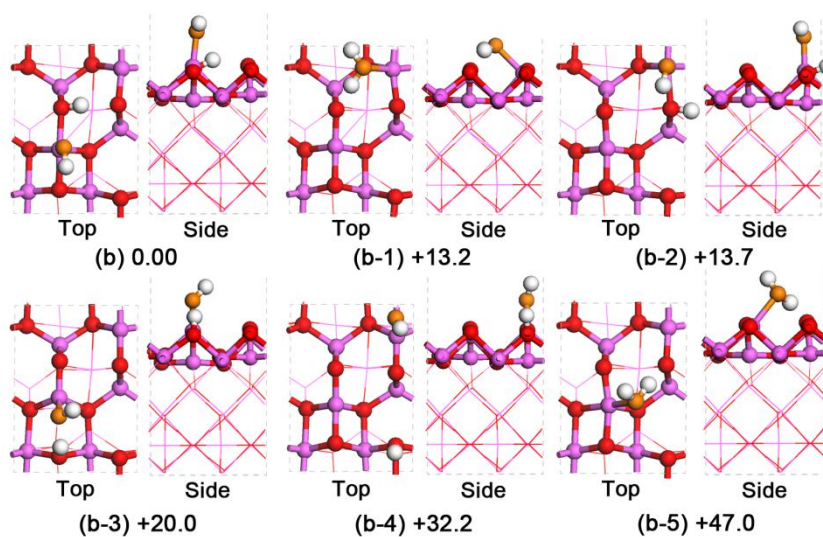

**Figure S2** Potential energy diagram and the structures of initial states (IS), transition states (TS), and final states (FS) for (a) CH<sub>4</sub> and C<sub>2</sub>H<sub>6</sub> formation and (b) CH<sub>3</sub>OCH<sub>3</sub> formation and on the partially hydroxylated  $\gamma$ -Al<sub>2</sub>O<sub>3</sub> (110D) surface in liquid paraffin. See Fig. 2 for color coding.

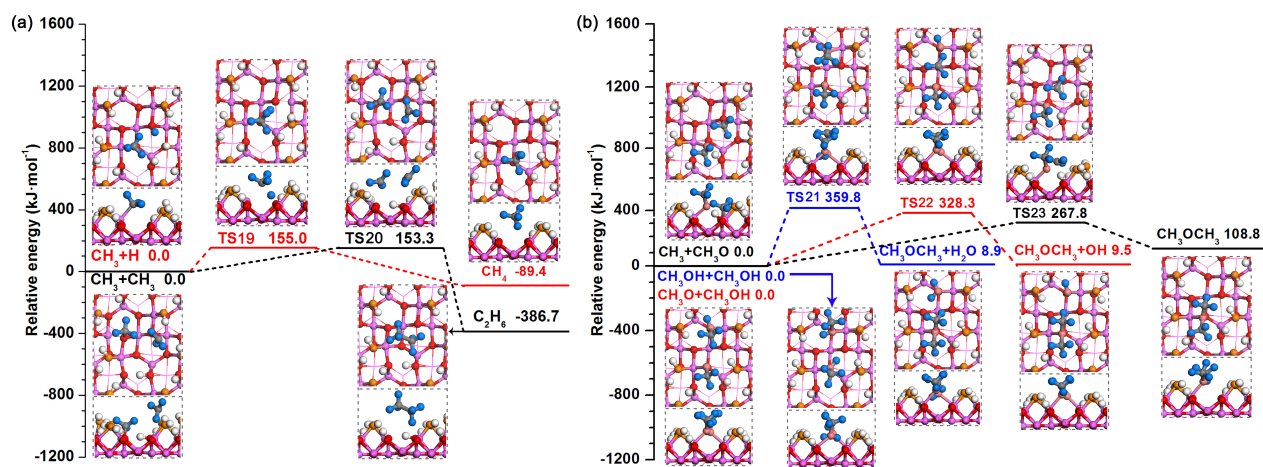

Supplement: c8cp02000k1.pdf [file c8cp02000k1.pdf]
